# Supplementary material for: Molecular-weight dependence of the formation of highly ordered lamellar structures of poly(N-dodecyl acrylamide) by humid annealing
Source: Royal Society of Chemistry journal article supplement (doi:10.1039/c8py01660g), 2019-01-01
Supplement: c8py01660g1.pdf [file c8py01660g1.pdf]

Supporting Information for

# Molecular-weight dependence of the formation of highly ordered lamellar structures in poly(*N*-dodecyl acrylamide) by humid annealing

*Kazuki Ebata<sup>a</sup>, Yuki Hashimoto<sup>a</sup>, Kohei Ebara<sup>b</sup>, Mayu Tsukamoto<sup>a</sup>, Shunsuke Yamamoto<sup>c</sup>,*

*Masaya Mitsuishi<sup>c</sup>, Shusaku Nagano<sup>d</sup>, Jun Matsui<sup>b\*</sup>*

<sup>a</sup>Graduate School of Science and Engineering, Yamagata University, 1-4-12 Kojirakawa-machi,  
Yamagata 990-8560, Japan

<sup>b</sup>Faculty of Science, Yamagata University, 1-4-12 Kojirakawa-machi, Yamagata 990-8560, Japan

<sup>c</sup>Institute for Multidisciplinary Research for Advanced Materials, Tohoku University, 2-1-1  
Katahira, Aoba-ku, Sendai 980-8577, Japan

<sup>d</sup>Nagoya University Venture Business Laboratory, Nagoya University, Furo-cho, Chikusa, Nagoya  
464-8603, Japan

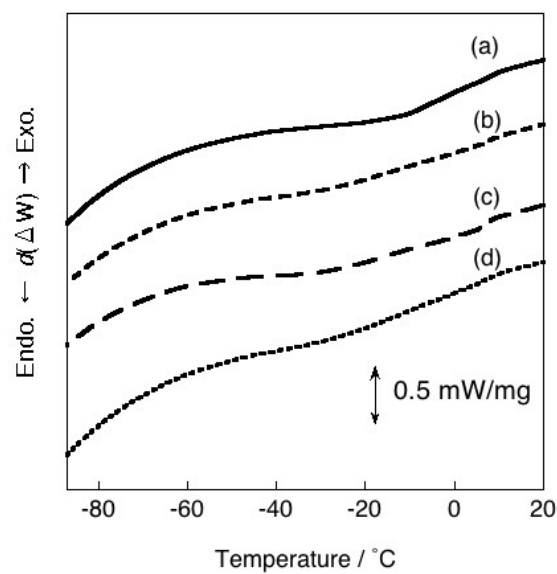

**Figure S1** Third heating curve in the DSC traces of (a) pDDA\_1.2k, (b) pDDA\_6.6k, (c) pDDA\_33k, and (d) pDDA\_52k measured from -90°C

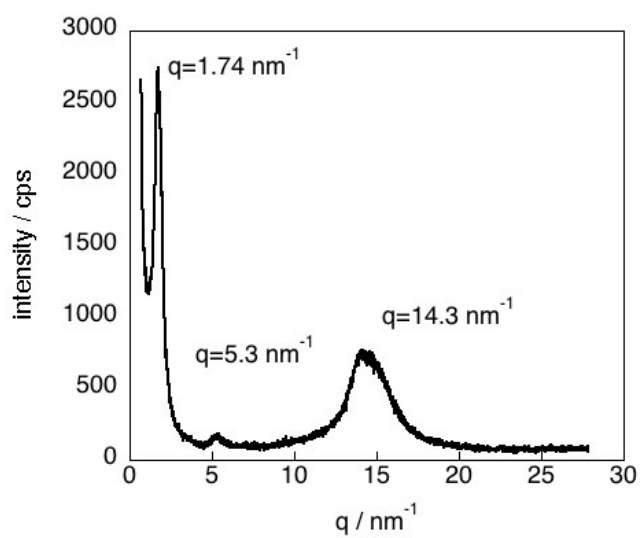

**Figure S2** Powder XRD spectrum for pDDA\_1.2k

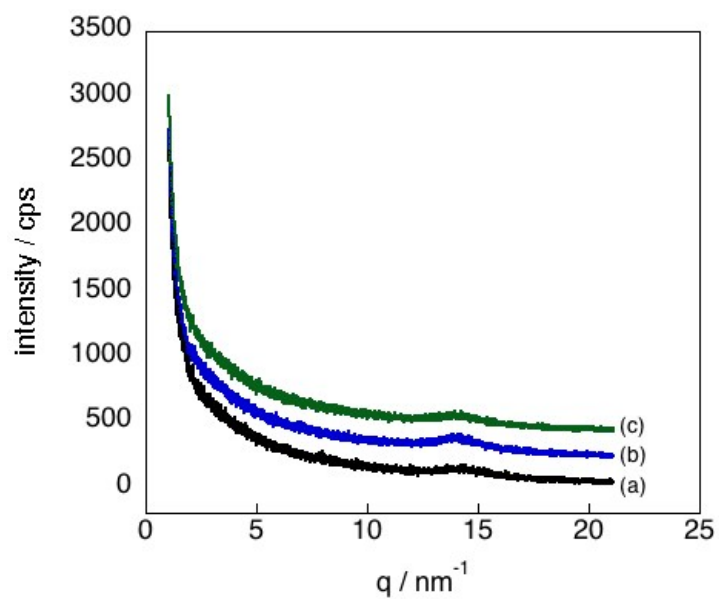

**Figure S3** In-plane XRD spectra of lamellar structured film prepared from (a) pDDA\_6.6k, (b) pDDA\_33k and (c) pDDA\_52k

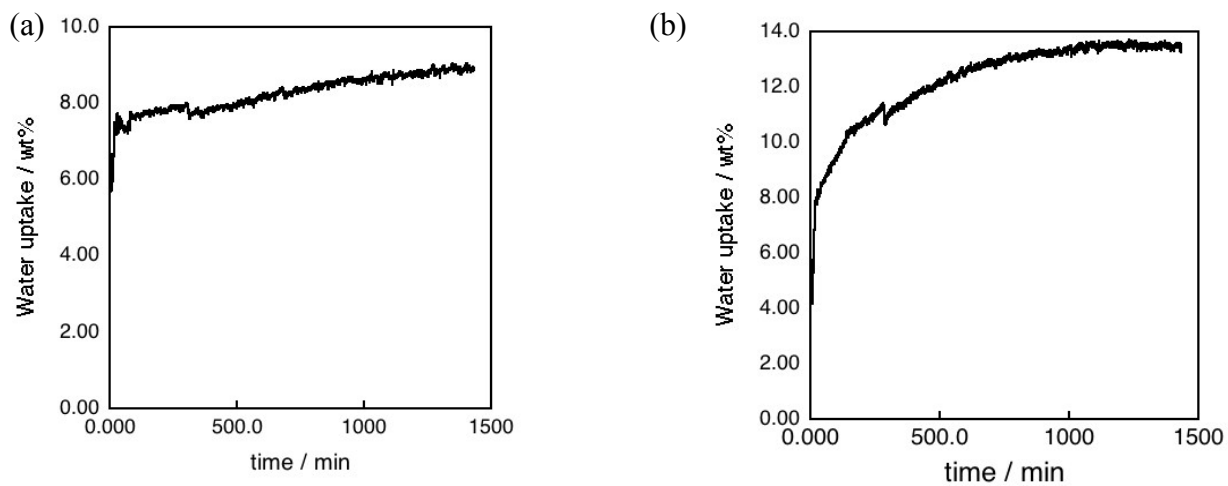

**Figure S4** Water uptake dynamics for (a) pDDA\_6.6k and (b) pDDA\_52k

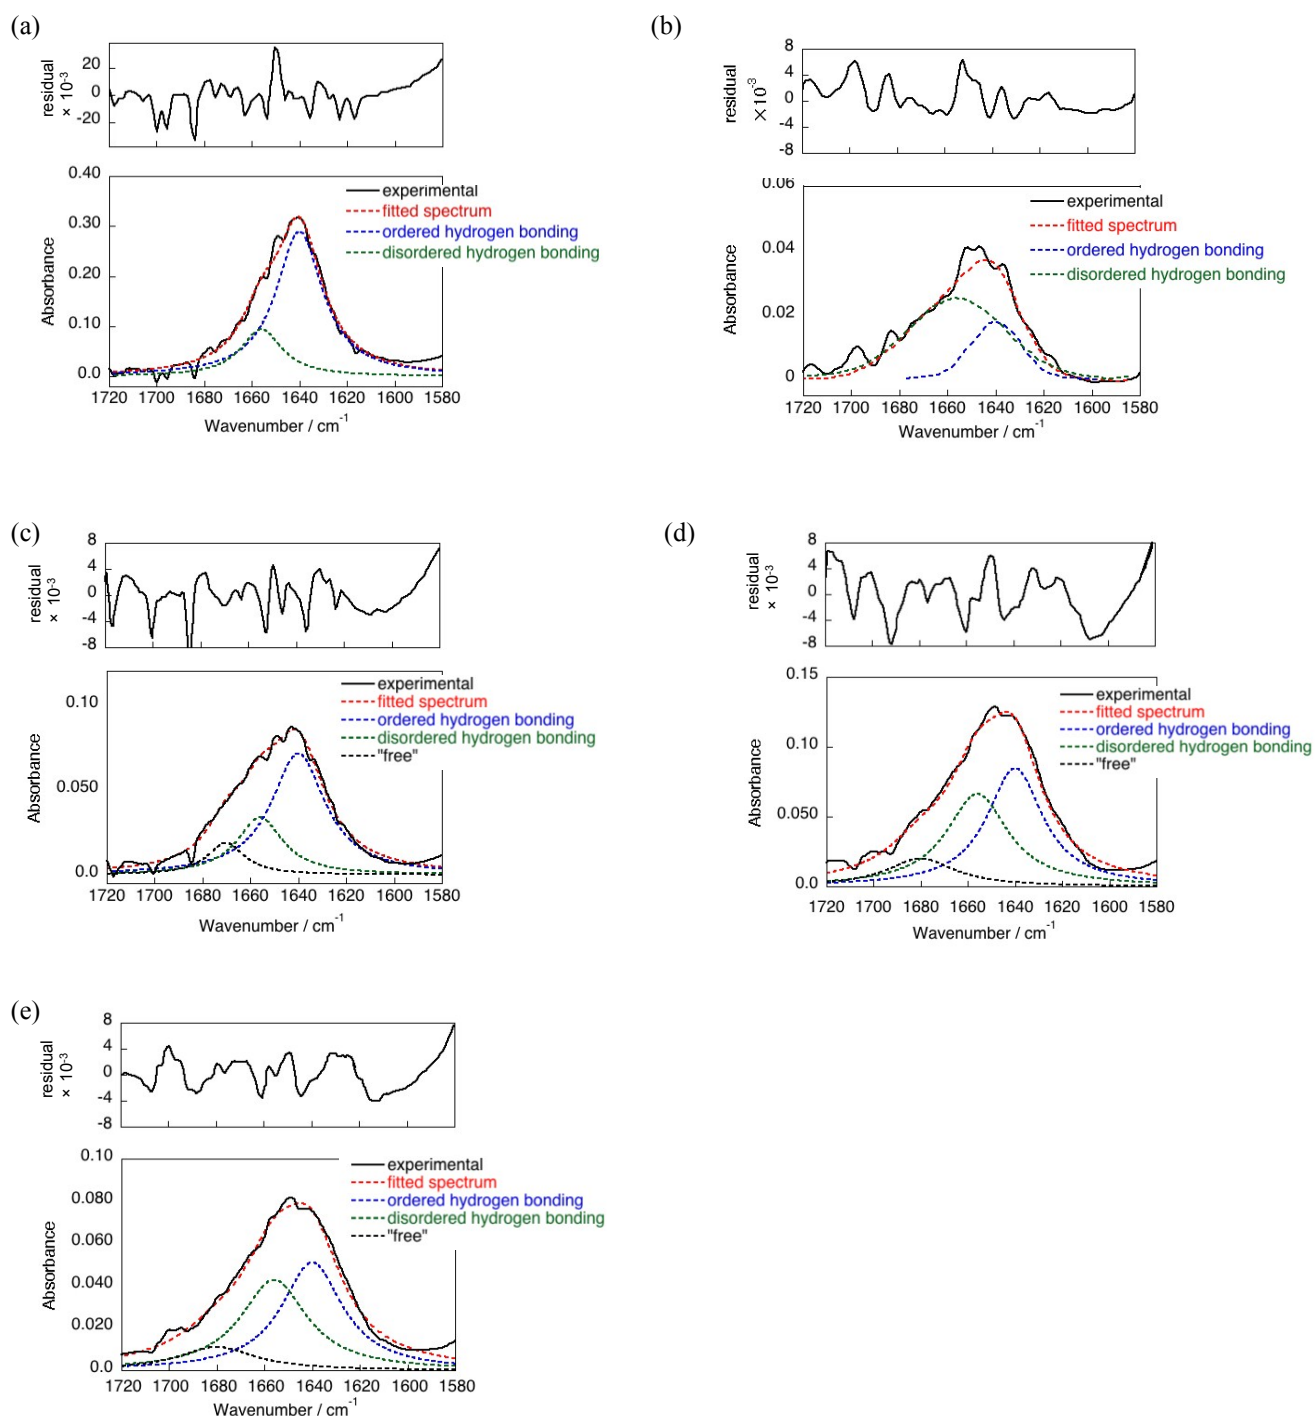

**Figure S5** Deconvolution of amide I region for (a) pDDA\_1.2k, (b) pDDA\_3.5k, (c) pDDA\_6.6k, (d) pDDA\_33k and (e) pDDA\_52k. Upper graph in each spectrum is the residual for the fitting results. Peak fitting was carried out by keeping the center wavenumbers at  $1640\text{ cm}^{-1}$  (ordered hydrogen-bonded carbonyl groups),  $1656\text{ cm}^{-1}$  (disordered hydrogen-bonded carbonyl groups) and  $1680\text{ cm}^{-1}$  (non-hydrogen-bonded “free” carbonyl groups).

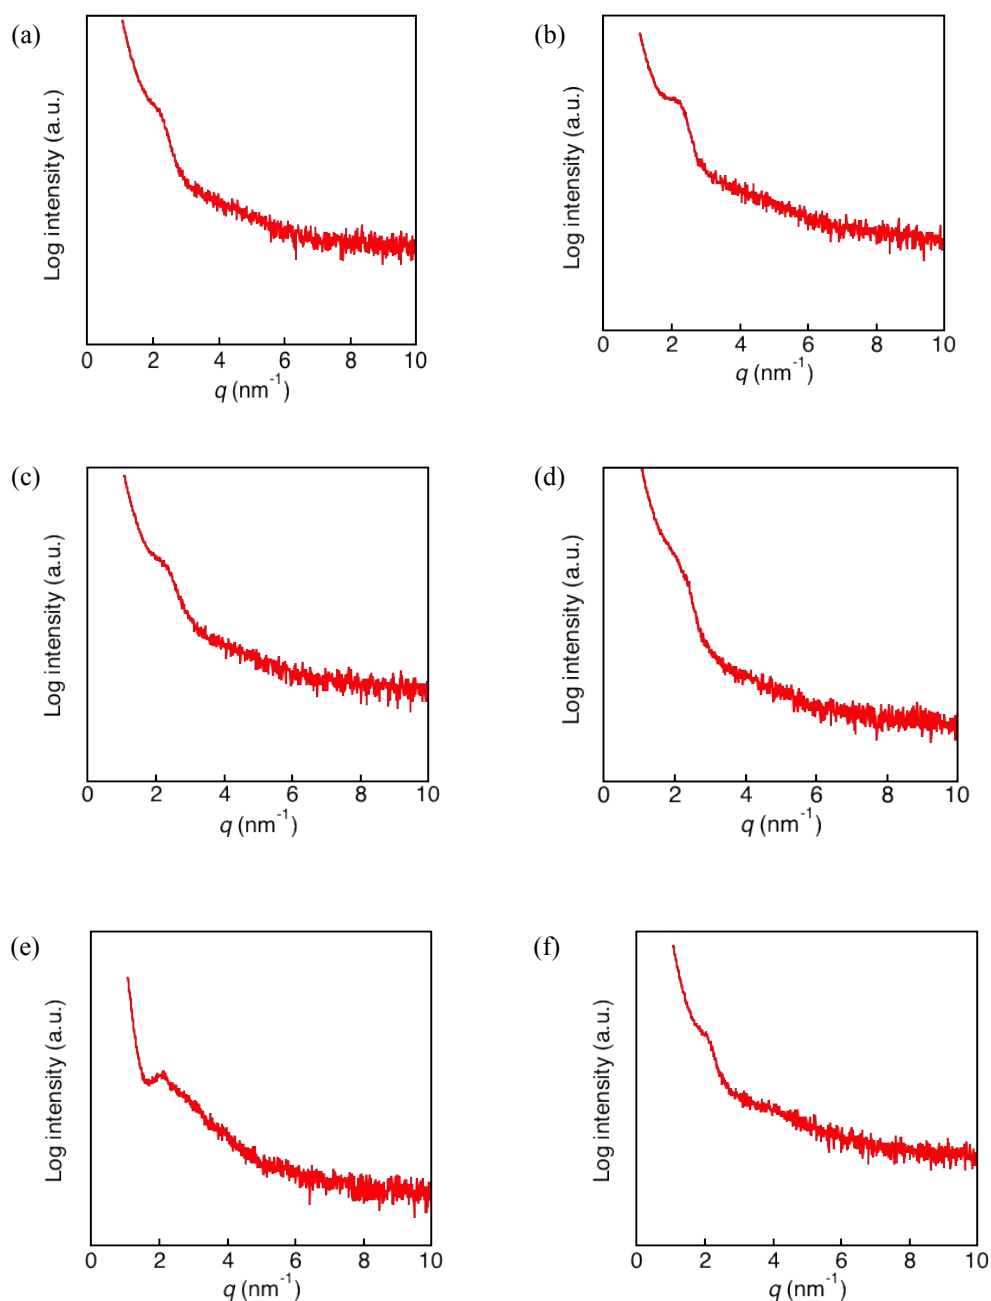

**Figure S6** XRD patterns of pDDA films annealed in different organic vapor (a) hexane, (b) acetone, (c) ethyl acetate, (d) acetonitrile, (e) methanol and (f) ethanol. The annealing temperature was 60 °C, except for acetone, which was annealed at 50 °C

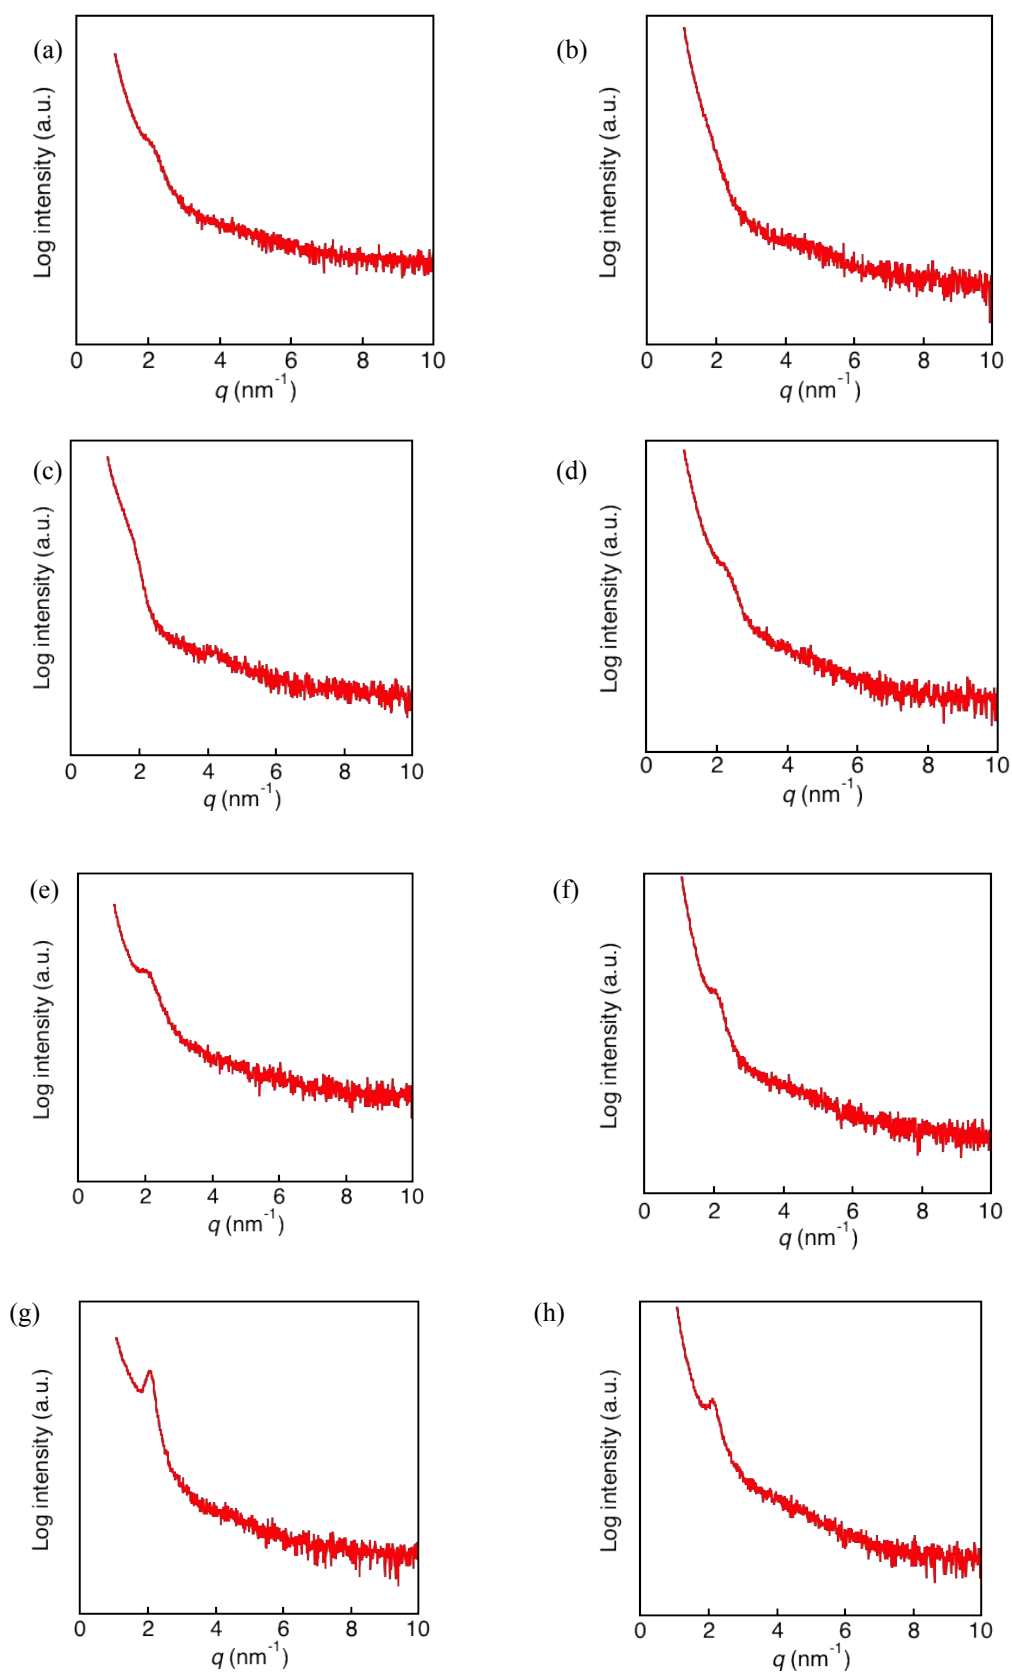

**Figure S7** XRD patterns of pDDA films annealed under different organic solvent (a) hexane, (b) acetone, (c) ethyl acetate, (d) acetonitrile, (e) methanol, (f) ethanol, (g) DMF, and (h) ethylene glycol. The annealing temperature was 60 °C, except for acetone, which was annealed at 50 °C
